# Supplementary material for: Pollination Effectiveness of the Hoverfly Eristalinus aeneus (Scopoli, 1763) in Diploid and Triploid Associated Watermelon Crop
Source: MDPI journal article supplement (doi:10.3390/insects13111021), 2022-11-05
Supplement: s1 [file s1]

**Table S1.** Sales price (EUR/kg) by farmers of diploid and triploid watermelon cultivar in Andalusia (Spain), according to fruit category, for June 2020 and 2021.

| Title 1  | Category    | Year 2020 | Year 2021 |
|----------|-------------|-----------|-----------|
| Diploid  | Category I  | 0.19      | 0.17      |
|          | Category II | 0.08      | 0.14      |
| Triploid | Category I  | 0.31      | 0.25      |
|          | Category II | 0.07      | 0.07      |

**Table S2.** Ranges of percentages of pollen grains attached to the stigmatic lobe of watermelon flowers according to observation zone (outermost, intermediate and innermost) for both years of the trial and treatments (release density: HD, MD and LD).

| Zone of stigmatic lobe | Year 2020 |          |          | Year 2021 |          |          |
|------------------------|-----------|----------|----------|-----------|----------|----------|
|                        | HD        | MD       | LD       | HD        | MD       | LD       |
| Outermost (3)          | 46 – 51%  | 46 – 54% | 40 – 47% | 35 – 53%  | 35 – 45% | 36 – 49% |
| Intermediate (2)       | 32 – 37%  | 29 – 41% | 35 – 38% | 31 – 45%  | 32 – 40% | 27 – 35% |
| Innermost (1)          | 17 – 18%  | 12 – 19% | 15 – 24% | 15 – 26%  | 35 – 45% | 19 – 33% |
